# Supplementary material
Source: publisher figshare collection journal article supplement (https://sage.figshare.com/ndownloader/files/17709839)
Supplement: Supplementary file 1 [file 17709839]

**Journal** of **Health**

and **Social Behavior**

OFFICIAL JOURNAL OF THE AMERICAN SOCIOLOGICAL ASSOCIATION

**ONLINE SUPPLEMENT**

**to article in**

Journal of Health and Social Behavior, 2019, Vol. 60, Issue 3

**Familism and the Hispanic Health Advantage: The Role of Immigrant Status**

**Christina J. Diaz**

*University of Arizona*

**Michael Niño**

*Willamette University*

| Table A1. Predicting Familism using Immigrant Generation | | | | | | | | | | | | | | | | | | | | | | | | | | |
| --- | --- | --- | --- | --- | --- | --- | --- | --- | --- | --- | --- | --- | --- | --- | --- | --- | --- | --- | --- | --- | --- | --- | --- | --- | --- | --- |
|  |  |  |  |  | |  | | |  | |  | |  | |  | | |  | | |  | |  | | |
|  | Referent Familism | | | | | | Family Obligations | | | | | | | | | Family Support | | | | | | | | | | | |
|  | Model 1a | | Model 1b | | Model 2a | | | | | Model 2b | | | | Model 3a | | | | | Model 3b | | | | |
| (First generation) |  |  |  |  |  | | |  | |  | |  | |  | | |  | | |  | |  | | |
| 1.5 generation | –.33*** | (.06) | .05 | (.07) | –.01 | | | (.03) | | .05 | | (.04) | | –.01 | | | (.05) | | | .01 | | (.06) | | |
| U.S.-born | –.51*** | (.04) | .03 | (.08) | –.09** | | | (.03) | | .00 | | (.04) | | –.01 | | | (.03) | | | .01 | | (.07) | | |
|  |  |  |  |  |  | | |  | |  | |  | |  | | |  | | |  | |  | | |
| Constant | 3.40*** | (.03) | 3.65*** | (.18) | 4.26*** | | | (.01) | | 4.40*** | | (.11) | | 3.96*** | | | (.02) | | | 4.58*** | | (.16) | | |
| *N* | 4,078 | | | | 4,078 | | | | | | | | | 4,078 | | | | | | | | | | |
| Source: Hispanic Community Health Study/Study of Latinos Parent and Sociocultural Ancillary Study, 2008-2011.  Note: Standard errors in parentheses. Model 1b, 2b, and 3b control for demographic, socioeconomic, and cultural characteristics described earlier. Results obtained from separate OLS regressions.  **p*  < .05, ***p* < .01, ****p*  < .001 | | | | | | | | | | | | | | | | | | | | | | | | | | |
|
|  | |  |  |  | |  | | |  | |  | |  | |  | | |  | | |  | |  | | |

| Table A2. Regression Models Predicting Physical and Mental Health Outcomes from Familism and Immigrant Generation | | | | | | |
| --- | --- | --- | --- | --- | --- | --- |
|  | Cardiac Risk  β(SE) | BMI  β(SE) | Diabetes  OR [95% CI] | C-reactive protein  OR [95% CI] | Depression  IRR [95% CI] | Anxiety  IRR [95% CI] |
| Immigrant generation |  |  |  |  |  |  |
| (1st generation) |  |  |  |  |  |  |
| 1.5 generation | .06(.15) | 1.62(.58)** | .51[.29, .93]* | 1.41[.89, 2.22] | 1.00[.85, 1.18] | 1.02[.95, 1.09] |
| U.S.-born | .28(.17) | 1.73(.50)*** | 1.03[.66, 1.61] | 1.55[1.03, 2.33]* | 1.09[.94, 1.26] | 1.03[.97, 1.10] |
| Familism |  |  |  |  |  |  |
| Family obligations | .13(.08) | –.10(.36) | .90[.66, 1.23] | .89[.71, 1.12] | .96[.89, 1.05] | 1.01[.97, 1.04] |
| Family support | –.03(.07) | .48(.23)* | .99[.80, 1.23] | 1.19[.99, 1.43] | .94[.88, .99]* | 0.97[.94, .99]* |
| Family as referents | –.07(.05) | –.35(.23) | 1.22[1.01, 1.47]* | 1.03[.89, 1.19] | 1.13[1.07, 1.19]*** | 1.04[1.02, 1.07]*** |
| Family conflict | –.01(.08) | –.18(.28) | .83[.61, 1.13] | .95[.76, 1.19] | 1.35[1.25, 1.47]*** | 1.11[1.07, 1.16]*** |
| Age | .10(.02)*** | .36(.05)*** | 1.14[1.06, 1.22]*** | 1.07[1.02, 1.11]** | 1.03[1.01, 1.05]*** | 1.02[1.01, 1.02]*** |
| Age2 | –.00(.00)*** | –.00(.00)*** | 1.00[1.00, 1.00] | 1.00[1.00, 1.00]** | 1.00[1.00, 1.00]*** | 1.00[1.00, 1.00]*** |
| Male | .70(.06)*** | –1.27(.28)*** | 1.06[.81, 1.40] | .40[.34, .48]*** | .77[.72, .83]*** | .93[0.90, 0.95]*** |
| Marital status |  |  |  |  |  |  |
| (Single) |  |  |  |  |  |  |
| Married/cohabiting | .15(.10) | –.03(.36) | .73[.51, 1.05] | 1.01[.79, 1.31] | .95[.86, 1.04] | .99[.95, 1.03] |
| Other | .19(.10) | –.13(.39) | .66[.46, .96]* | 1.15[.85, 1.55] | 1.07[.97, 1.19] | 1.00[.95, 1.05] |
| Number of children |  |  |  |  |  |  |
| No children | –.12(.11) | –.91(.43)* | 1.17[.75, 1.84] | .68[.49, .94]* | 1.00[.88, 1.12] | 1.01[.97, 1.05] |
| (1–2 children) |  |  |  |  |  |  |
| 3 or more children | .03(.08) | .81(.31)** | 1.47[1.15, 1.88]** | 1.04[.83, 1.30] | .98[.90, 1.07] | .99[.95, 1.03] |
| Educational attainment |  |  |  |  |  |  |
| (less than high school) |  |  |  |  |  |  |
| High school | –.16(.08) | –.31(.36) | .98[.71, 1.35] | 1.02[.80, 1.30] | .90[.80, 1.01] | .96[.91, 1.01] |
| Some college or more | –.04(.09) | –.99(.36)** | .97[.73, 1.29] | .68[.54, .86]*** | .86[.78, .96]** | .94[.90, .99]** |
| English fluency | –.06(.06) | .24(.23) | 1.14[.93, 1.39] | .97[.81, 1.15] | 1.06[1.01, 1.12]* | 1.03[1.00, 1.05]* |
| Household income |  |  |  |  |  |  |
| < $10,000 | .02(.07) | –.03(.35) | 1.20[.89, 1.62] | .88[.68, 1.13] | 1.19[1.09, 1.29]*** | 1.06[1.02, 1.10]** |
| ($10,000–$20,000) |  |  |  |  |  |  |
| $20,000–$29,000 | –.04(.09) | –.03(.41) | 1.15[.78, 1.69] | 1.20[.91, 1.56] | .91[.82, 1.00]* | .97[.93, 1.01] |
| $30,000–$50,000 | –.04(.09) | .28(.37) | 1.08[.77, 1.52] | 1.24[.93, 1.66] | .74[.65, .83]*** | .90[.85, .94]*** |
| >$50,000 | .06(.14) | –.42(.51) | .53[.26, 1.04] | .92[.59, 1.43] | .68[.59, .79]*** | .86[.81, .91]*** |
| Employment status |  |  |  |  |  |  |
| (Full-time) |  |  |  |  |  |  |
| Part-time | .07 (.08) | –.03(.38) | .69[.45, 1.07] | .95[.73, 1.25] | 1.02[.92, 1.14] | 1.01[.97, 1.05] |
| Retired | .30 (.18) | 2.23(.58)*** | 1.23[.75, 2.01] | 1.93[1.30, 2.84]*** | 1.23[1.06, 1.42]** | 1.11[1.05, 1.18]*** |
| Unemployed | .16 (.07)* | .55(.31) | 1.19[.85, 1.66] | 1.27[1.00, 1.63]* | 1.15[1.06, 1.25]*** | 1.07[1.04, 1.10]*** |
| Has insurance | –.14 (.07) | –.46(.34) | 1.07[.83, 1.37] | 1.07[.86, 1.34] | .98[.90, 1.07] | 1.00[.96, 1.04] |
| Country of origin |  |  |  |  |  |  |
| (Mexican) |  |  |  |  |  |  |
| Puerto Rican | .01(.14) | 1.64(.53)** | .94[.63, 1.41] | 1.55[1.12, 2.16]** | 1.25[1.13,1.39]*** | 1.03[.98, 1.08] |
| Cuban | .14(.09) | .57(.43) | .55[.34, .87]** | 1.60[1.21, 2.12]*** | 1.12[1.01,1.25]* | .98[.94, 1.02] |
| Other Hispanic | –.09(.10) | .99(.72) | .61[.40, .93]* | 1.60[1.05, 2.45]* | 1.06[0.96,1.17] | 1.00[.95, 1.05] |
| Central/South American | .19(.09)* | .72(.38) | .67[.47, .95]* | 1.33[1.01, 1.74]* | 1.07[0.96,1.19] | .96[.92, .99]* |
| Constant | 1.58(.51)** | 20.80(1.85)** | .00[.00, .01]*** | .13[.03, .47]** | 3.61[2.14, 6.08]*** | 11.72[9.50, 14.45]*** |
| *N* | 4,078 | 4,078 | 4,078 | 4,078 | 4,078 | 4,078 |
| Source: Hispanic Community Health Study/Study of Latinos Parent and Sociocultural Ancillary Study, 2008-2011.  Note: β = unstandardized coefficient; SE=standard error; OR=odds ratio; CI=confidence interval; IRR=incidence rate ratio. **p* <.05, ***p* <.01, ****p* <.001 | | | | | | |

| | Table A3. Regression Models Predicting Physical and Mental Health Outcomes from Familism, Immigrant Generation, and Interactions | | --- | | | | | | | | |
| --- | --- | --- | --- | --- | --- | --- | --- | --- |
|  | Cardiac Risk  β(SE) | BMI  β(SE) | Diabetes  OR [95% CI] | C-reactive protein  OR [95% CI] | Depression  IRR [95% CI] | Anxiety  IRR [95% CI] |
| Immigrant generation |  |  |  |  |  |  |
| (1st generation) |  |  |  |  |  |  |
| 1.5 generation | –.16(.81) | 1.21(.4.15) | .02[.00, 1.41] | 1.91[.06, 58.02] | .91[.33, 2.53] | .97[.64, 1.46] |
| US-born | 1.73(.1.19) | –.95(3.37) | .38[.01, 13.43] | .64[.07, 6.17] | 1.04[.51 ,2.13] | 1.26[.90, 1.76] |
| Familism |  |  |  |  |  |  |
| Family obligations | .13(.08) | –.25(.38) | .86[.61, 1.21] | .96[.72, 1.28] | .90[.82, 1.00]* | .99[.94, 1.03] |
| Family support | –.02(.06) | .31(.25) | .90[.70, 1.16] | 1.07[.85, 1.34] | .98[.91, 1.05] | 1.00[.97, 1.03] |
| Family as referents | –.10(.05) | –.19(.23) | 1.26[1.02, 1.57]* | 1.02[.86, 1.22] | 1.15[1.08, 1.23]*** | 1.05[1.02, 1.07]*** |
| Interactions |  |  |  |  |  |  |
| 1.5 gen*Obligations | –.19(.26) | –.55(1.15) | 1.04[.27, 4.04] | .63[.23, 1.74] | 1.19[.83, 1.69] | 1.13[.96, 1.33] |
| U.S.-born*Obligations | .05(.20) | .75(.–1.13) | 1.25[.51, 3.04] | .93[.47, 1.82] | 1.20[.99, 1.45] | 1.02[.92, 1.14] |
| 1.5 gen*Support | .25(.24) | 1.53(.80) | 1.82[.75, 4.42] | 2.00[.96, 4.19] | .87[.71, 1.07] | .91[.82, 1.01] |
| U.S.-born*Support | –.15(.22) | .03(.82) | 1.24[.71, 2.18] | 1.15[.71, 1.86] | .89[.77, 1.02] | .93[.86, 1.00] |
| 1.5 gen*Referents | .01(.15) | –1.08(.75) | 1.33[.69, 2.59] | .70[.44, 1.11] | .98[.81, 1.18] | .97[.91, 1.04] |
| U.S.-born*Referents | –.36(.14)* | –.19(.58) | .77[.45, 1.34] | 1.24[.84, 1.82] | .92[.82, 1.04] | 1.00[.95, 1.06] |
| Family conflict | –.017(.08) | –.20(.28) | .82 .60, 1.12] | .95[.76, 1.19] | 1.35[.25, 1.46]*** | 1.11[1.07, 1.15]*** |
| Age | .10(.01)*** | .36(.05)*** | 1.14[1.07,1.22] *** | 1.06[1.02, 1.11]** | 1.03[1.01, 1.05]*** | 1.02[1.01, 1.02]*** |
| Age2 | –.00(.00)*** | –.00(.00)*** | 1.00[1.00, 1.00] | 1.00[1.00, 1.00]** | 1.00[1.00, 1.00]*** | 1.00[1.00, 1.00]*** |
| Male | .70(.06)*** | –1.25(.27)*** | 1.06[.80, 1.39] | .41[.34, .49]*** | .77[.72, .83]*** | .93[.90, .95]*** |
| Marital status |  |  |  |  |  |  |
| (Single) |  |  |  |  |  |  |
| Married/cohabiting | .13(.09) | –.01(.35) | .74[.51, 1.06] | 1.03[.80, 1.33] | .94[.86, 1.03] | .98[.94, 1.03] |
| Other | .18(.10) | –.08(.39) | .68[.46, .98]* | 1.18[.88, 1.58] | 1.06[.96, 1.17] | 1.00[.95, 1.05] |
| Number of children |  |  |  |  |  |  |
| No children | –.14(.11) | –.92(.43)* | 1.17[.75, 1.83] | .67[.49, 0.93]* | .99[.88, 1.12] | 1.01[.97, 1.05] |
| (1–2 children) |  |  |  |  |  |  |
| 3 or more children | .01(.08) | .77(.30)* | 1.44[1.13, 1.84]** | 1.04[.84, 1.29] | .98[.90, 1.06] | .99[.96, 1.03] |
| Educational attainment |  |  |  |  |  |  |
| (less than high school) |  |  |  |  |  |  |
| High school | –.17(.08)* | –.28(.36) | .98[.72, 1.35] | 1.02[.80, 1.31] | .90[.81, 1.00] | .96[.91, 1.01] |
| Some college or more | –.04(.09) | –.99(.35)** | .96[.72, 1.27] | .67[.54, .84]*** | .87[.78, .96]** | .95[.90, .99]* |
| English fluency | –.06(.06) | .27(.23) | 1.15[.94, 1.40] | .98[.83, 1.16] | 1.06[1.01, 1.11]* | 1.02[1.00, 1.04]* |
| Household income |  |  |  |  |  |  |
| < $10,000 | –.00(.07) | –.04(.34) | 1.19[.88, 1.60] | .88[.68, 1.12] | 1.19[1.10, 1.30]*** | 1.06[1.02, 1.10]*** |
| ($10,000–$20,000) |  |  |  |  |  |  |
| $20,000–$29,000 | –.04(.08) | –.06(.40) | 1.15[.79, 1.69] | 1.17[.91, 1.52] | .91[.83, 1.01] | .97[.94, 1.01] |
| $30,000–$50,000 | –.03(.09) | .28(.37) | 1.10[.78, 1.53] | 1.24[.92, 1.65] | .74[.66, .83]*** | .90[.86, .94]*** |
| >$50,000 | .05(.14) | –.44(.50) | .52[.26, 1.03] | .91[.58, 1.42] | .69[.59, .79]*** | .86[.81, .91]*** |
| Employment status |  |  |  |  |  |  |
| (Full-time) |  |  |  |  |  |  |
| Part-time | .08(.08) | –.01(.38) | .70[.45, 1.08] | .96[.73, 1.26] | 1.02 [.92, 1.14] | 1.01[.97, 1.05] |
| Retired | .30(.18) | 2.21(.57)*** | 1.23[.75, 2.02] | 1.92[1.31, 2.82]*** | 1.23[1.06, 1.42]** | 1.12[1.05, 1.18]*** |
| Unemployed | .18(.07)* | .57(.31) | 1.19[.85, 1.67] | 1.28[1.00, 1.63] | 1.15[1.06, 1.25]*** | 1.07[1.04, 1.10]*** |
| Has insurance | –.14(.07)* | –.47(.33) | 1.06[.82, 1.36] | 1.07[.86, 1.34] | .98[.90, 1.07] | 1.00 [.97, 1.04] |
| Country of origin |  |  |  |  |  |  |
| (Mexican) |  |  |  |  |  |  |
| Puerto Rican | .02(.14) | 1.70(.53)** | .94[.63, 1.41] | 1.60[1.16, 2.21]** | 1.24[1.12, 1.37]*** | 1.03[.98, 1.08] |
| Cuban | .11(.09) | .55(.43) | .55[.34, .88]* | 1.62[1.23, 2.14]*** | 1.12[1.01, 1.24] | .98[.94, 1.02] |
| Other Hispanic | –.12(.10) | .97(.67) | .61[.40, .92]* | 1.64[1.08, 2.48]* | 1.04[.94, 1.15] | 1.00[.95, 1.04] |
| Central/South American | .18(.09)* | .71(.38) | .66[.47, .95]* | 1.33[1.01, 1.75]* | 1.07[.96, 1.19] | .96[.92, .99]* |
| Constant | 1.27(.49)*** | 21.40(1.86)*** | .00[.00, .02]*** | .15[.04, .60]** | 3.74[2.11, 6.64]*** | 11.72[9.50, 14.45]*** |
| *N* | 4,078 | 4,078 | 4,078 | 4,078 | 4,078 | 4,078 |
| Source: Hispanic Community Health Study/Study of Latinos Parent and Sociocultural Ancillary Study, 2008-2011.  Note: β = unstandardized coefficient; SE=standard error; OR=odds ratio; CI=confidence interval; IRR=incidence rate ratio. **p* <.05, ***p* <.01, ****p* <.001 | | | | | | | |

| | Table A4. Regression models Predicting Physical and Mental Health Outcomes from Familism, Family Conflict, and Interactions. | | --- | | | | | | | |
| --- | --- | --- | --- | --- | --- | --- | --- |
|  | Cardiac Risk  β(SE) | BMI  β(SE) | Diabetes  OR [95% CI] | C-reactive protein  OR [95% CI] | Depression  IRR [95% CI] | Anxiety  IRR [95% CI] | |
| Immigrant generation |  |  |  |  |  |  | |
| (1st generation) |  |  |  |  |  |  | |
| 1.5 generation | .05(.14) | 1.63(.59)** | .51[.29, .92]* | 1.40[.89, 2.21] | 1.01[.86, 1.18] | 1.02[0.95, 1.09] | |
| US-born | .27(.17) | 1.70(.49)*** | 1.01[.65, 1.58] | 1.53[1.02, 2.31]* | 1.08[.94, 1.24] | 1.03[.97, 1.09] | |
| Familism |  |  |  |  |  |  | |
| Family obligations | .06(.09) | –.55(.40) | .90[.63, 1.28] | .85[.63, 1.14] | .91[.82, 1.01] | .97[.93, 1.01] | |
| Family support | –.10(.09) | .80(.26)** | .98[.75, 1.26] | 1.16[.93, 1.44] | .97[.90, 1.05] | .99[.96, 1.02] | |
| Family as referents | –.04(.05) | –.21(.24) | 1.31[1.06, 1.62]* | 1.06[.91, 1.25] | 1.16[1.09, 1.25]*** | 1.05[1.02, 1.08]*** | |
| Family conflict | –1.42(.64)* | –.84(2.41) | 1.97[.17, 22.66] | .48[.08, 2.93] | 1.42[.79, 2.56] | .87[.66, 1.15] | |
| conflict*obligations | .22(.15) | 1.51(.92) | .98[.50, 1.90] | 1.17[.64, 2.13] | 1.20[1.00, 1.45] | 1.14[1.04, 1.25]*** | |
| conflict*support | .22(.13) | –1.04(.60) | 1.07[.66, 1.73] | 1.10[.75, 1.61] | .89[.79, 1.01] | .94[.89, 1.00] | |
| conflict*referents | –.12(.11) | –.52(.40) | .73[.49, 1.09] | .89[.66, 1.21] | .89[.79, .99]* | .98[.93, 1.03] | |
| Age | .10(.02)*** | .36(.05)*** | 1.14[1.06, 1.22]*** | 1.07[1.02, 1.12]** | 1.03[1.01, 1.05]*** | 1.02[1.01, 1.02]*** | |
| Age2 | –.00(.00)*** | –.00(.00)*** | 1.00[1.00, 1.00] | 1.00[1.00,1.00]** | 1.00[1.00,1.00]*** | 1.00[1.00, 1.00]*** | |
| Male | .70(.06)*** | –1.27(.28)*** | 1.06[.81, 1.40] | .40[.34, .48]*** | .77[.72, .83]*** | .93[.90, .95]*** | |
| Marital status |  |  |  |  |  |  | |
| (Single) |  |  |  |  |  |  | |
| Married/cohabitating | .15(.09) | –.06(.35) | .73[.51, 1.05] | 1.01[.79, 1.30] | .95[.86, 1.03] | .99[.94, 1.03] | |
| Other | .19(.10) | –.13(.39) | .66[.46, .96]* | 1.15[.85, 1.55] | 1.07[.97, 1.19] | 1.00[.95, 1.05] | |
| Number of children |  |  |  |  |  |  | |
| No children | –.12(.11) | –.94(.43)* | 1.18[.75, 1.84] | .68[.49, .94]* | .99[.88, 1.12] | 1.01[.96, 1.05] | |
| (1–2 children) |  |  |  |  |  |  | |
| 3 or more children | .02(.08) | .77(.30)* | 1.46[1.15, 1.87]** | 1.03[.83, 1.30] | .97[.89, 1.06] | .99[.95, 1.02] | |
| Educational attainment |  |  |  |  |  |  | |
| (less than high school) |  |  |  |  |  |  | |
| High school | –.17(.09)* | –.34(.35) | .98[.71, 1.35] | 1.01[.80, 1.29] | .89[.80, 1.00]* | .95[.91, 1.00] | |
| Some college or more | –.05(.09) | –.99(.37)** | .98[.74, 1.30] | .68[.54, .86]*** | .86[.78, .96]** | .94[.90, .99]* | |
| English fluency | –.05(.06) | .23(.22) | 1.14[.93, 1.39] | .97[.82, 1.16] | 1.06[1.01, 1.11]* | 1.03[1.00, 1.05]* | |
| Household income |  |  |  |  |  |  | |
| < $10,000 | .01(.07) | –.03(.35) | 1.21[.90, 1.62] | .88[.68, 1.13] | 1.19[1.09, 1.29]*** | 1.06[1.02, 1.10]*** | |
| ($10,000–$20,000) |  |  |  |  |  |  | |
| $20,000–$29,000 | –.05(.09) | .00(.40) | 1.16[.80, 1.70] | 1.20[.92, 1.56] | .91[.83, 1.00] | .97[.93, 1.01] | |
| $30,000–$50,000 | –.04(.09) | .33(.37) | 1.10[.78, 1.53] | 1.24[.92, 1.66] | .74[.66, .83]*** | .90[.86, .94]*** | |
| >$50,000 | .05(.14) | –.38(.50) | .53[.27, 1.05] | .91[.59, 1.41] | .69[.59, .79]*** | .86[.81, .91]*** | |
| Employment status |  |  |  |  |  |  | |
| (Full-time) |  |  |  |  |  |  | |
| Part-time | .08(.08) | –.01(.38) | .70[.46, 1.08] | .96[.74, 1.26] | 1.03[.92, 1.15] | 1.01[.97, 1.05] | |
| Retired | .30(.18) | 2.18(.57)*** | 1.22[.74, 2.01] | 1.93[1.31, 2.85]*** | 1.21[1.05, 1.41]** | 1.11[1.05, 1.18]*** | |
| Unemployed | .16(.07)* | .56(.31) | 1.20[.86, 1.67] | 1.28[1.00, 1.63] | 1.15[1.06, 1.25]*** | 1.07[1.04, 1.10]*** | |
| Has insurance | –.14(.07) | –.45(.32) | 1.07[.83, 1.37] | 1.07[.87, 1.34] | .98[.90, 1.07] | 1.00[.97, 1.04] | |
| Country of origin |  |  |  |  |  |  | |
| (Mexican) |  |  |  |  |  |  | |
| Puerto Rican | .01(.14) | 1.68(.52)** | .94[.63, 1.41] | 1.55[1.12, 2.15]** | 1.26[1.13, 1.40]*** | 1.04[.99, 1.09] | |
| Cuban | .15(.09) | .57(.43) | .54[.34, .86]** | 1.60[1.21, 2.12]*** | 1.12[1.01, 1.24]* | .98[.94, 1.03] | |
| Other Hispanic | –.09(.09) | .96(.69) | .60[.40, .90]* | 1.60[1.05, 2.42]* | 1.05[.95, 1.16] | 1.00[.95, 1.04] | |
| Central/South American | .20(.09)* | .72(.38) | .67[.47, .95]* | 1.33[1.02,1.75]* | 1.07[.96, 1.18] | .96[.92, .99]* | |
| Constant | 1.97(.51)*** | 20.99(2.08)*** | .00[.00, .01]*** | .15[.04, .63]** | 3.52[2.03, 6.10]*** | 12.86[10.52, 15.72]*** | |
| *N* | 4,078 | 4,078 | 4,078 | 4,078 | 4,078 | 4,078 | |
| Source: Hispanic Community Health Study/Study of Latinos Parent and Sociocultural Ancillary Study, 2008-2011.  Note: β = unstandardized coefficient; SE=standard error; OR=odds ratio; CI=confidence interval; IRR=incidence rate ratio. **p* <.05, ***p* <.01, ****p* <.001 | | | | | | |
